# Supplementary material
Source: PubMed Central journal article supplement (PMC9414330)
Supplement: 10780432ccr210361-sup-259808_2_supp_7397389_qzfy94.pdf [file 10780432ccr210361-sup-259808_2_supp_7397389_qzfy94.pdf]

**Supplementary Table 1. List of shRNAs**

| Name        | ID MISSION® shRNA Library (Sigma Aldrich) | Target gene   | NCBI accession number |
|-------------|-------------------------------------------|---------------|-----------------------|
| shIL13RA2-1 | TRCN0000058523                            | Human IL13RA2 | NM_000640.3           |
| shIL13RA2-2 | TRCN0000427870                            | Human IL13RA2 | NM_000640.3           |
| shEFNB1-1   | TRCN0000455035                            | Human EFNB1   | NM_004429.5           |
| shEFNB1-2   | TRCN0000058656                            | Human EFNB1   | NM_004429.5           |
| shEPHB1-1   | TRCN0000000819                            | Human EPHB1   | NM_004441.5           |
| shEPHB1-2   | TRCN0000355608                            | Human EPHB1   | NM_004441.5           |

**Supplementary Table 2. List of primers and sgRNAs**

| Target                                             | Name              | Sequence 5'-> 3'                                                                                                                   | Use                                                                                                                    | Reference  |
|----------------------------------------------------|-------------------|------------------------------------------------------------------------------------------------------------------------------------|------------------------------------------------------------------------------------------------------------------------|------------|
| Human RPLO<br>GenBank accession:<br>NM_001002.4    | Hu-RPLP0-F1       | GTGATGTGCAGCTGATC<br>AAGACT                                                                                                        | qRT-PCR                                                                                                                | This study |
|                                                    | Hu-RPLP0-R1       | GATGACCAGCCCAAAGG<br>AGA                                                                                                           |                                                                                                                        | This study |
| Human IL13Rα2<br>GenBank accession:<br>NM_000640.3 | Hu-IL13RA2-<br>R2 | TCCAAATTCGGTCATCTG<br>AGCA                                                                                                         | qRT-PCR                                                                                                                | This study |
|                                                    | Hu-IL13RA2-<br>F2 | TGGAGCATACCTTTGGG<br>ACC                                                                                                           |                                                                                                                        | This study |
| Human IL13Rα2<br>GenBank accession:<br>NM_000640.3 | F2-OE-<br>IL13RA2 | TATCGCTGTACACGGAGAAA<br>TGGCTTTCGTTTGCTTGGC                                                                                        | Cloning and over<br>expression of IL13Rα2 into<br>pTRIPZ vector                                                        | This study |
|                                                    | R2-OE-<br>IL13RA2 | CCGACGCGTTCAAGCGTAAT<br>CTGGAACATCGTATGGGTAT<br>GTATCACAGAAAAATTCTG                                                                |                                                                                                                        | This study |
| Human IL13Rα2<br>GenBank accession:<br>NM_000640.3 | F1-shRNA-<br>8523 | TCGAGAAGGTATATTGCTGT<br>TGACAGTGAGCGCGCTACG<br>TTTCTGGCTACCATTAGTG<br>AAGCCACAGATGTTAAATGG<br>TAGCCAGAAACGTAGCATG<br>CCTACTGCCTCGG | To clone shRNA targeting<br>TGCTACGTTTCTGGCTACCA<br>TT (from TRCN0000058523)<br>in cDNA of IL13RA2 to<br>pTRIPZ vector | This study |
|                                                    | R1-shRNA-<br>8523 | AATCCGAGGCAGTAGGCA<br>TGCTACGTTTCTGGCTACCA<br>TTTACATCTGTGGCTTCACTA<br>AATGGTAGCCAGAAACGTA<br>GCGCGCTCACTGTCAACAGC<br>AATATACCTTC  |                                                                                                                        | This study |
| Human IL13Rα2<br>GenBank accession:<br>NM_000640.3 | F1-shRNA-<br>7870 | TCGAGAAGGTATATTGCTGT<br>TGACAGTGAGCGGCATAC<br>CTTTGGGACCTATTCTAGTG<br>AAGCCACAGATGTAGAATA<br>GGTCCCAAAGGTATGCTTGC<br>CTACTGCCTCGG  | To clone shRNA targeting<br>AGCATACCTTTGGGACCTAT<br>TC (from<br>TRCN0000427870) in cDNA<br>of IL13RA2 in pTRIPZ vector | This study |

|                                                    |                |                                                                                                                                    |                                                                                                   |            |
|----------------------------------------------------|----------------|------------------------------------------------------------------------------------------------------------------------------------|---------------------------------------------------------------------------------------------------|------------|
|                                                    | R1-shRNA-7870  | AATTCCGAGGCAGTAGGCA<br>AGCATACCTTTGGGACCTAT<br>TCTACATCTGTGGCTTCACT<br>AGAATAGGTCCCAAAGGTA<br>TGCGCGCTCACTGTCAACAG<br>CAATATACCTTC |                                                                                                   | This study |
| pTripz Sox4.965<br>Addgen cat #<br>101120          | R1-pTripz-Sox4 | TCAAAGAGATAGCAAGGTA<br>TTCAGT                                                                                                      | Verification of shRNA<br>cloning into pTripz<br>Sox4.965                                          | This study |
|                                                    | F2-pTripz-Sox4 | TCGATAGTTTGTGGAATGA<br>GGCT                                                                                                        |                                                                                                   | This study |
| Human EEF1A2<br>GenBank accession:<br>NM_001958.5  | hu-EEF1A2-F1   | TCTCCAAGAATGGGCAGAC<br>G                                                                                                           | qRT-PCR                                                                                           | This study |
|                                                    | hu-EEF1A2-R1   | TTGACGATCTCGTCGTAGCG                                                                                                               |                                                                                                   | This study |
| Human EPHB1<br>GenBank accession:<br>NM_004441.5   | EphB1-F1       | CTTTGACCCTCCAGAAGTGG                                                                                                               | qRT-PCR                                                                                           | [1]        |
|                                                    | EphB1-R1       | CTCCACATTGTCGTCACAGC                                                                                                               |                                                                                                   | [1]        |
| Human EFN1<br>GenBank accession:<br>NM_004429.5    | EfnB1-F1       | TGCCTGTAGCACAGTTCTCG                                                                                                               | qRT-PCR                                                                                           | This study |
|                                                    | EfnB1-R1       | CCCATGTAGTTGGGGCTGA<br>A                                                                                                           |                                                                                                   | This study |
| Human IL13Rα2<br>GenBank accession:<br>NM_000640.3 | sgIL13RA2-1    | ATAGTGGATCCCGGATACTT                                                                                                               | For cloning in px459 v2.0<br>(RRID:Addgene_62988)<br>and targeting exon 3 of<br>human IL13Rα2 gen | This study |
| Human IL13Rα2<br>GenBank accession:<br>NM_000640.3 | sgIL13RA2-2    | CCTGGGCAGAACTACTTAT                                                                                                                | For cloning in px459 v2.0<br>(RRID:Addgene_62988)<br>and targeting exon 4 of<br>human IL13Rα2 gen | This study |
| Human IL13Rα2<br>GenBank accession:<br>NM_000640.3 | sgIL13RA2-3    | GCTTTCGTTTGCTGGCTAT                                                                                                                | For cloning in px459 v2.0<br>(RRID:Addgene_62988)<br>and targeting exon 2 of<br>human IL13Rα2 gen | This study |
| Human IL13Rα2<br>GenBank accession:<br>NM_000640.3 | sgIL13RA2-4    | GGCATAGGTGTA CTCTTGA                                                                                                               | For cloning in px459 v2.0<br>(RRID:Addgene_62988)<br>and targeting exon 5 of<br>human IL13Rα2 gen | This study |

**Supplementary Table 3: List of antibodies**

| Target    | Vendor                   | Cat #     | Host   | Dilution/Use                     | RRID       |
|-----------|--------------------------|-----------|--------|----------------------------------|------------|
| IL13RA2   | Abcam                    | ab55275   | Mouse  | 1:2000/WB                        | AB_943819  |
| IL13RA2   | R&D                      | AF146     | Goat   | 1:1000/WB; 1:80/IHC              | AB_354809  |
| Ephrin B1 | Thermo Fisher Scientific | 37-8100   | Mouse  | 1:500/WB;<br>1:100/IHC; 1:100/IF | AB_2533342 |
| EEF1A2    | Genetex                  | GTX102326 | Rabbit | 1:1000/WB                        | AB_1950166 |
| EPHB1     | Santa cruz               | SC-130054 | Mouse  | 1:1000/WB                        | AB_2246581 |
| GAPDH     | Cell Signaling           | 97166     | Mouse  | 1:1000/WB                        | AB_2756824 |

|                                             |                           |                 |        |                                     |             |
|---------------------------------------------|---------------------------|-----------------|--------|-------------------------------------|-------------|
| Rabbit IgG (H+L)<br>Alexa Fluor 680         | Life Technology           | A-21109         | Goat   | 1:10000/WB                          | AB_2535758  |
| Mouse IgG Alexa<br>Fluor 800                | LICOR                     | 926-32210       | Goat   | 1:15000/WB                          | AB_621842   |
| Mouse IgG (H+L)<br>Alexa Fluor 680          | Invitrogen                | A-21058         | Goat   | 1:10000/WB                          | AB_2535724  |
| Goat IgG (H+L)<br>Alexa Fluor 680           | Invitrogen                | A-21084         | Donkey | 1:10000/WB                          | AB_141494   |
| HA-tag                                      | Cell Signaling            | 3724S           | Rabbit | 1:1000/WB                           | AB_1549585  |
| BrdU                                        | Abcam                     | AB6326          | Rat    | 1:100/Flow; 1:200/IF                | AB_305426   |
| Rat IgG (H+L)<br>DyLight 488                | Thermo Fisher             | SA5-10026       | Donkey | 1:200/Flow                          | AB_2556606  |
| IL13RA1                                     | Abcam                     | AB79277         | Rabbit | 1:2000/WB                           | AB_1640587  |
| ImmPRESS Anti-<br>Goat Ig                   | Vector Laboratories       | MP-7405         | Horse  | As manufacturer<br>instructions/IHC | AB_2336526  |
| ImmPRESS-AP Anti-<br>Mouse                  | Vector Laboratories       | MP-5402         | Horse  | As manufacturer<br>instructions/IHC | AB_2336535  |
| Phospho-FAK<br>(Tyr925)                     | Cell Signaling            | 3284S           | Rabbit | 1:10000/WB;<br>1:200/IF             | AB_10831810 |
| Purified Mouse<br>Anti-FAK                  | BD Biosciences            | 610087          | Mouse  | 1:10000/WB                          | AB_397494   |
| Phospho-Src Family<br>(Tyr416)              | Cell Signaling            | 2101            | Rabbit | 1:10000/WB                          | AB_331697   |
| Src (L4A1) Mouse<br>mAb                     | Cell Signaling            | 2110            | Mouse  | 1:10000/WB                          | AB_10691385 |
| Anti-ERK 1/2<br>Antibody (C-9)              | Cell Signaling            | CS-9101S        | Mouse  | 1:10000/WB                          | AB_331646   |
| p44/42 MAPK<br>(Erk1/2)                     | Cell Signaling            | CS-9102S        | Rabbit | 1:10000/WB                          | AB_330744   |
| Anti-Rat IgG (H+L)<br>Alexa Fluor 594       | Jackson<br>ImmunoResearch | 712-585-<br>153 | Donkey | 1:100/IF                            | AB_2340689  |
| Anti-Mouse Alexa<br>Fluor 488               | Life Technology           | A11029          | Goat   | 1:500/IF                            | AB_138404   |
| Anti-Rabbit IgG<br>(H+L) Alexa Fluor<br>594 | Jackson<br>ImmunoResearch | 711-585-<br>152 | Donkey | 1:100/IF                            | AB_2340621  |

1. Karwaciak I, Salkowska A, Karas K, Sobalska-Kwapis M, Walczak-Drzewiecka A, Pulaski L, Strapagiel D, Dastych J, Ratajewski M: **SIRT2 Contributes to the Resistance of Melanoma Cells to the Multikinase Inhibitor Dasatinib.** *Cancers (Basel)* 2019, **11**(5).
