# Supplementary material
Source: PubMed Central journal article supplement (PMC9414330)
Supplement: 10780432ccr210361-sup-259808_2_supp_7401659_qzm03b.pdf [file 10780432ccr210361-sup-259808_2_supp_7401659_qzm03b.pdf]

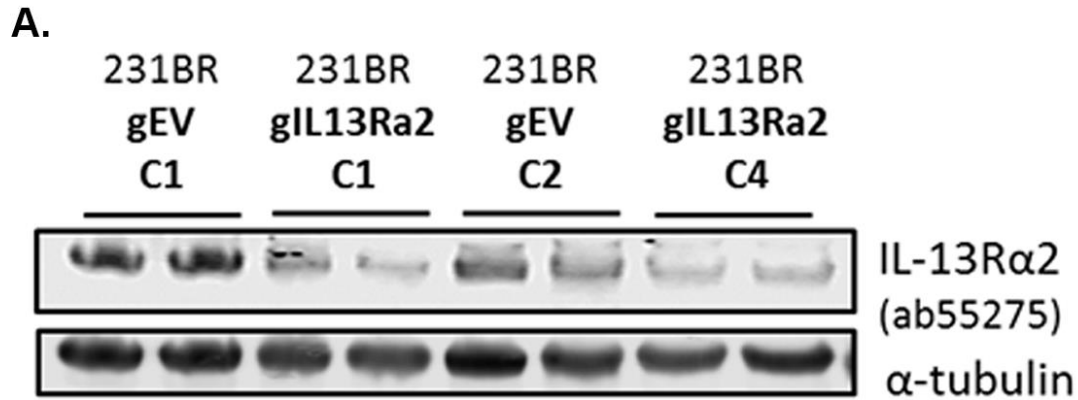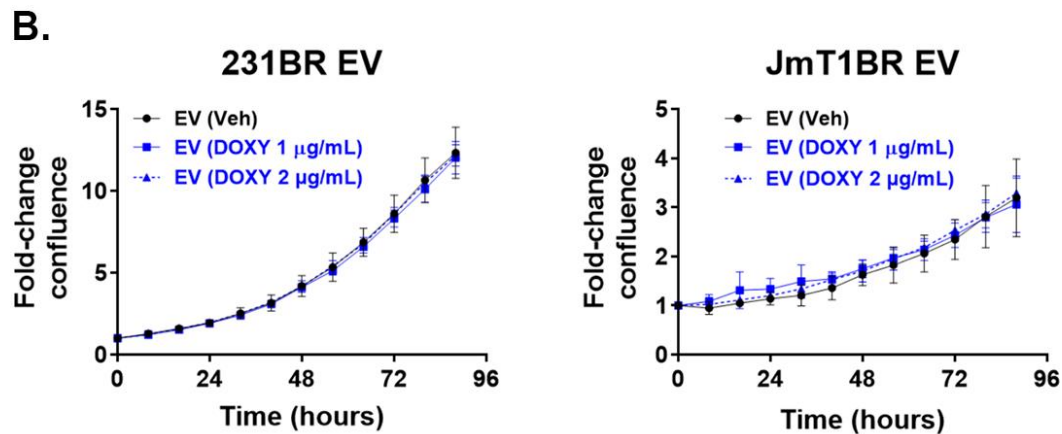

**Supplementary Figure 1.** **A.** 231BR cells were transfected with an empty vector (gEV) or using sgRNAs targeting IL13R $\alpha$ 2 (gIL13Ra2). Cells were selected for clonal populations and IL13R $\alpha$ 2 protein expression assessed by western blot.  $\alpha$ -tubulin was used as loading control. **B.** 231BR and JmT1BR3 cells transfected with a DOXY inducible system were assessed to determine any possible side proliferation effect after DOXY induction. Cells harboring the EV were treated with DOXY at 1  $\mu$ g/mL or 2  $\mu$ g/mL and % of confluence was measured over time using Incucyte live imaging. (n=4 treatment). There were no significant changes in proliferation.
