# Supplementary material
Source: PubMed Central journal article supplement (PMC9414330)
Supplement: 10780432ccr210361-sup-259808_2_supp_7401660_qzr03b.pdf [file 10780432ccr210361-sup-259808_2_supp_7401660_qzr03b.pdf]

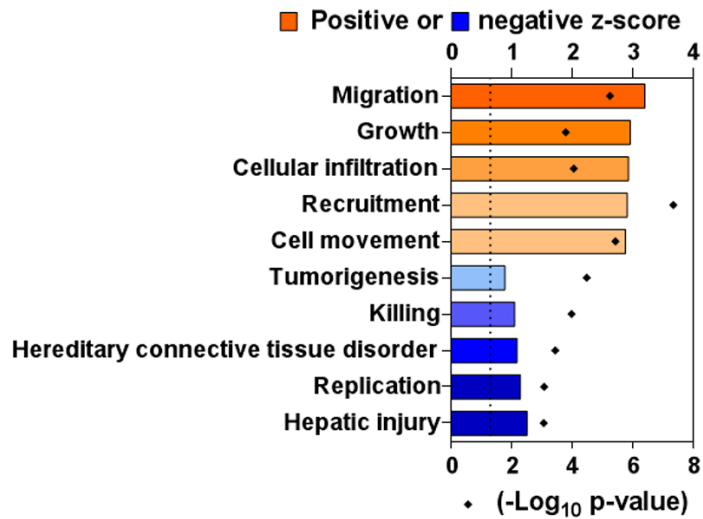

**Supplementary Figure 2.** Global RNA sequencing was performed in doxycycline-induced 231BR EV vs 231BR sh*IL13RA2* cells 48 h after DOXY-induction (n=3/group). Ingenuity® Pathway Analysis (IPA®). The p-value (calculated with the Fischer's exact) and Z-score were determined to establish any probable association between our set of genes and a function. Migration and replication biofunctions are predicted as being activated and repressed, respectively, when *IL13Rα2* is downregulated with a high absolute Z-score ( $\geq 2$ ) and a significant p-value ( $< 0.05$ ).
