# Supplementary material
Source: PubMed Central journal article supplement (PMC9414330)
Supplement: 10780432ccr210361-sup-259808_2_supp_7401661_qzb03b.pdf [file 10780432ccr210361-sup-259808_2_supp_7401661_qzb03b.pdf]

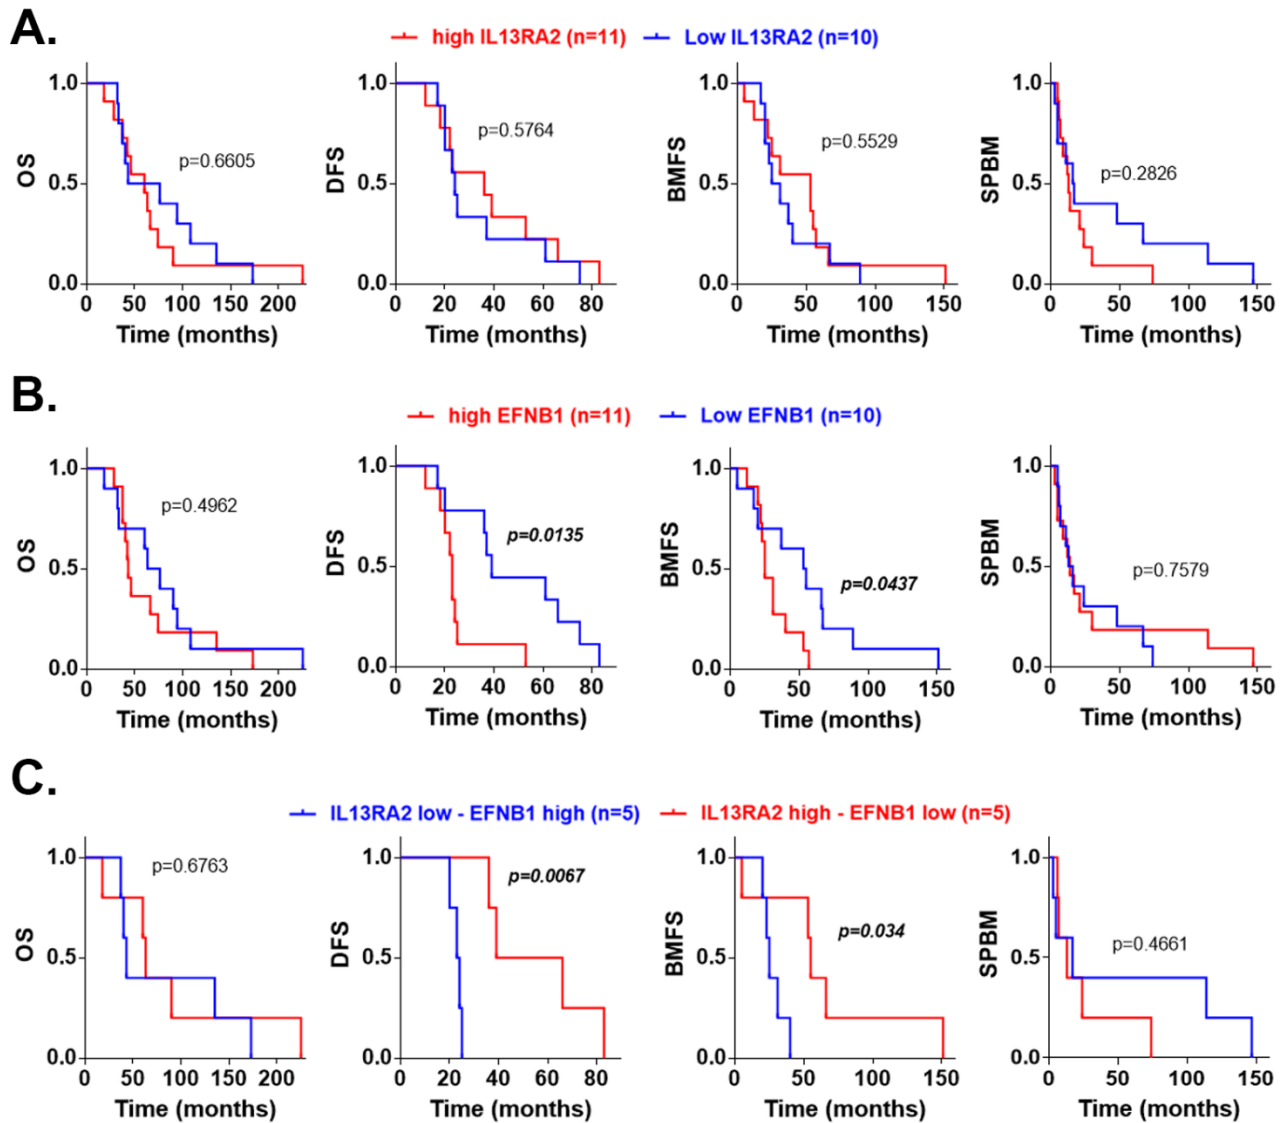

**Supplementary Figure 3.** Predictive value of *IL13RA2* or *EFNB1* mRNA levels in primary tumors known to metastasize to brain. Dataset contains 21 matched breast cancer primary and brain metastasis samples, reported in (<https://pubmed.ncbi.nlm.nih.gov/29961873/>). **A.** Kaplan-meier plots for *IL13RA2* mRNA expression in primary tumors. **B.** Kaplan-Meier plots to *EFNB1* mRNA in primary tumors. **C.** Kaplan-meier plots for primary tumors with low-*IL13RA2*/high-*EFNB1* compared to samples with high-*IL13RA2*/low-*EFNB1*. For all plots, average mRNA expression was determined for each target and expression ranked as low (below mean) or high (above mean). Survival curves comparisons were made using Log-rank (Mantel-Cox) test.  $p < 0.05$  was considered significant (*italic bold*). OS: overall survival; DFS: disease free survival; BMFS: brain metastasis free survival; SPBM: survival post brain metastasis.
