# Supplementary material
Source: PubMed Central journal article supplement (PMC9414330)
Supplement: 10780432ccr210361-sup-259808_2_supp_7401662_qzs03b.pdf [file 10780432ccr210361-sup-259808_2_supp_7401662_qzs03b.pdf]

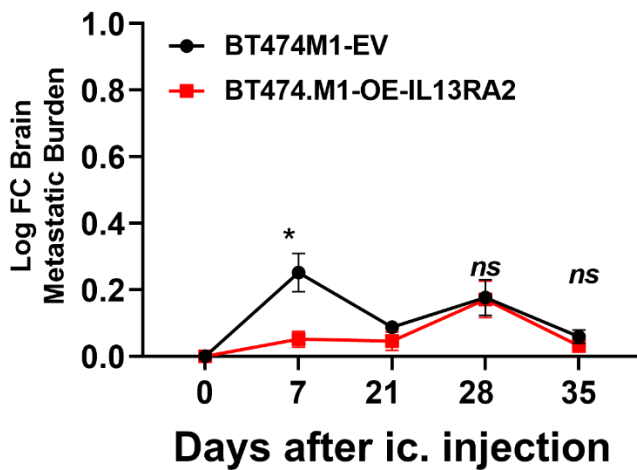

**Supplementary Figure 4. Overexpression of IL13R $\alpha$ 2 does not increase metastatic colonization in poorly invasive BT474M1 BC cells.** Poorly metastatic ER+HER2+ BT474M1 cells expressing EV or OE-*IL13RA2* and a luciferase reporter, were induced with doxycycline for 48 h prior to injecting in dox-treated NSG mice implanted with 1 mg E2 pellets (N=12 per group). Brain metastatic colonization was measured via IVIS at the indicated times. Head total flux for each animal was normalized to brain signal at time 0 (Fold Change FC). Graph shows Log-transformed FC  $\pm$ SEM over time for EV vs OE-IL13RA2 injected mice. Normally distributed Log-transformed FC values were analyzed using Repeated Measures Mixed effects.\* P=0.02 at 7 days. Ns at other time points.
